# Supplementary material for: CLEAR: coverage-based limiting-cell experiment analysis for RNA-seq
Source: PubMed Central journal article supplement (PMC7008572; doi:10.1186/s12967-020-02247-6), 2020-02-10
Supplement: 12967_2020_2247_MOESM1_ESM.pdf [file 12967_2020_2247_MOESM1_ESM.pdf]

**Supplementary Material For:**

**CLEAR: Coverage-based Limiting-cell Experiment Analysis for RNA-seq**

Logan A Walker<sup>1,2</sup>, Michael G Sovic<sup>2</sup>, Chi-Ling Chiang<sup>2,3</sup>, Eileen Hu<sup>2,3</sup>, Jiyeon K Denninger<sup>4</sup>, Xi Chen<sup>2</sup>, Elizabeth D Kirby<sup>4,5</sup>, John C Byrd<sup>2,3</sup>, Natarajan Muthusamy<sup>2,3</sup>, Ralf Bundschuh<sup>1,3,6,7\*</sup>, & Pearly Yan<sup>2,3\*</sup>

<sup>1</sup> *Department of Physics, College of Arts and Sciences*

<sup>2</sup> *The Ohio State University Comprehensive Cancer Center*

<sup>3</sup> *Division of Hematology, Department of Internal Medicine, College of Medicine*

<sup>4</sup> *Department of Psychology, College of Arts and Sciences*

<sup>5</sup> *Chronic Brain Injury Program, The Ohio State University*

<sup>6</sup> *Department of Chemistry & Biochemistry, College of Arts and Sciences*

<sup>7</sup> *Center for RNA Biology, The Ohio State University, Columbus, OH*

\* To whom correspondence should be addressed. Tel: +1 614 688 3978 and +1 614 685 9164; Email: bundschuh@mps.ohio-state.edu and Pearly.Yan@osumc.edu

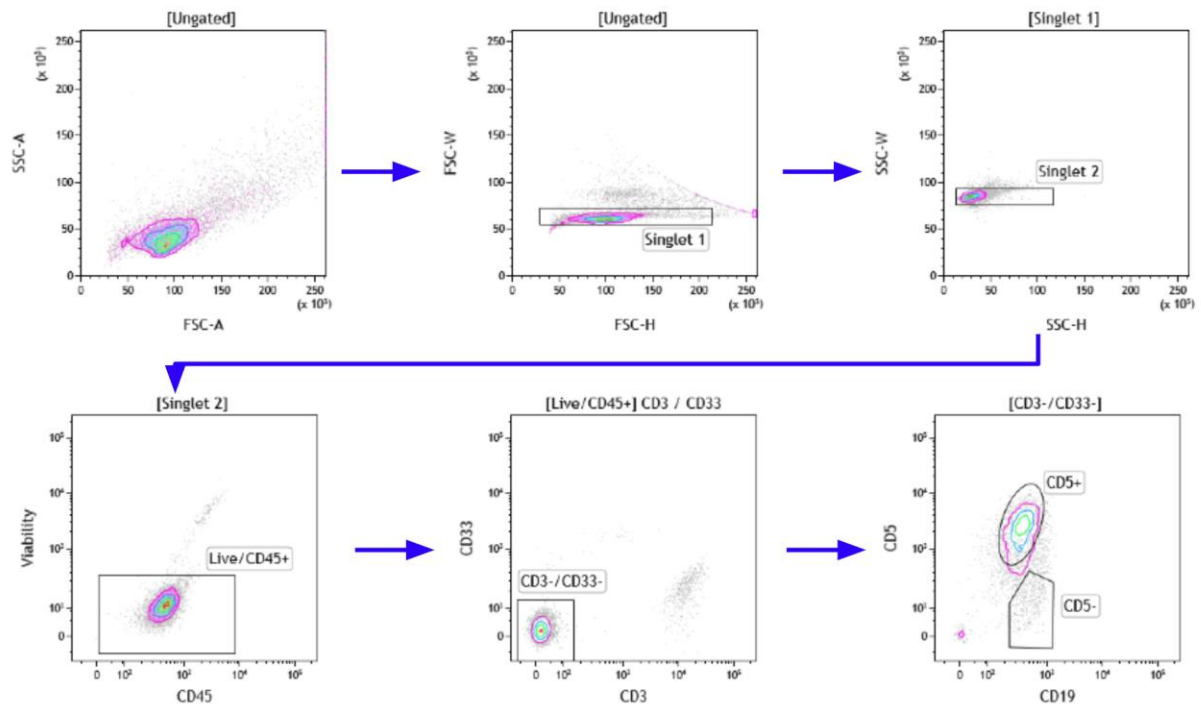

**Figure S1. FACS parameter diagrams for the enrichment of CD5+ and CD5- cells from a CLL**

**patient PBMC sample.** FACS flow diagrams depicting the steps involved in the enrichment of CD5+ cells and CD5- cells from live CD45+, CD3-, CD33-, CD19+ cells, followed by separation into either CD5+ or CD5- collection tubes (Figure 1). FACS: Fluorescence Activated Cell Sorting.

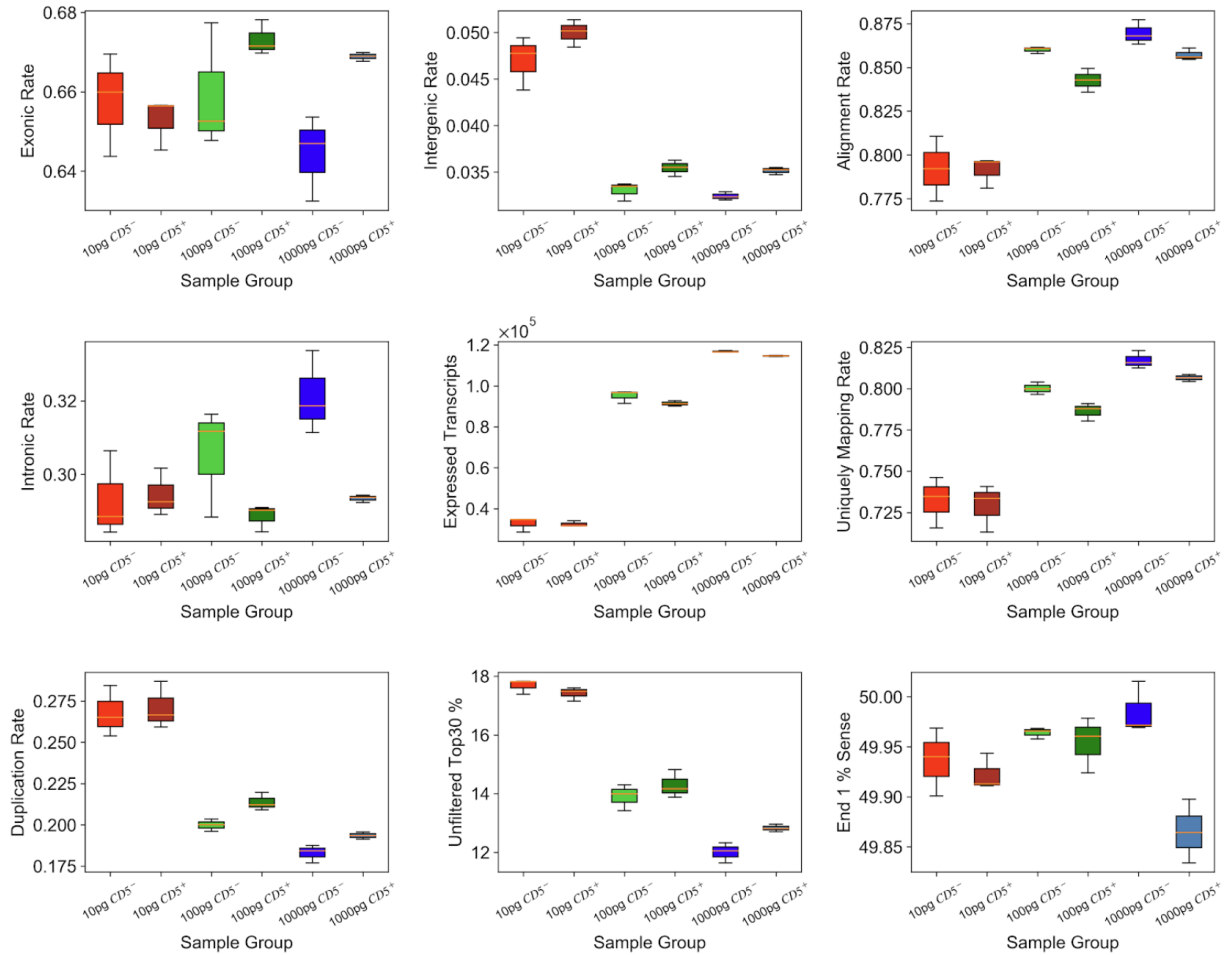

**Figure S2. Survey of quality control (QC) metrics of RNA-Seq data.** All sequencing was subject to quality control as described in **Methods**. Key metrics are summarized here. Notably, in many metrics such as Intergenic Rate, Alignment Rate, and Duplication Rate, the 10-pg groups indicate lower quality libraries than 100-pg and 1000-pg. “Top30” corresponds to the proportion of reads that belong to the 30 highest genes by expression. Boxplots: orange line, mean metric value; whiskers: displaying 1.5X the inter-quartile range (IQR) beyond the first and the third quartiles; circles: outliers.

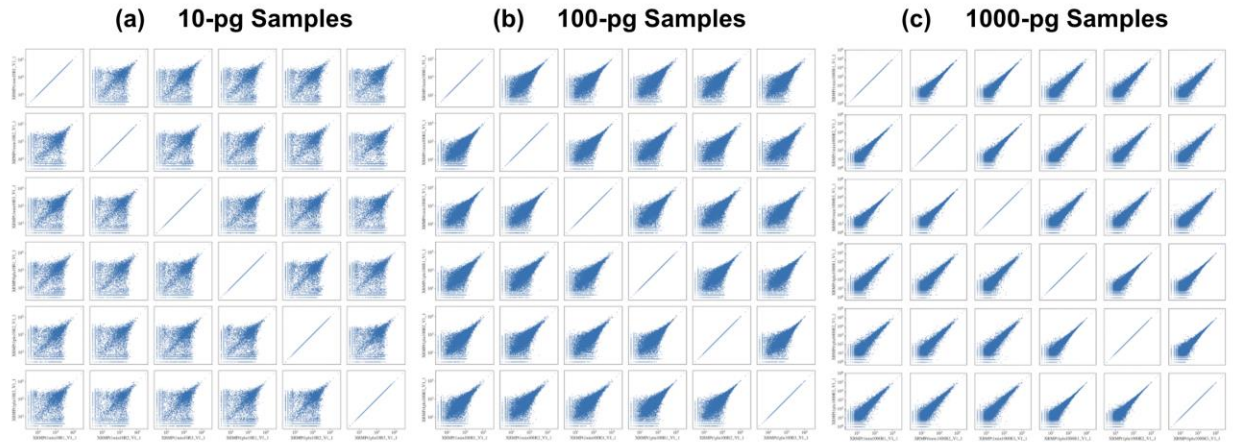

**Figure S3. Between-sample correlations of detected RNA-Seq read counts.** Scatter plots are drawn comparing each sample to each other sample for each input mass. 10-pg samples show much more scattered counts, whereas 100-pg and 1000-pg samples show progressively higher correlation.

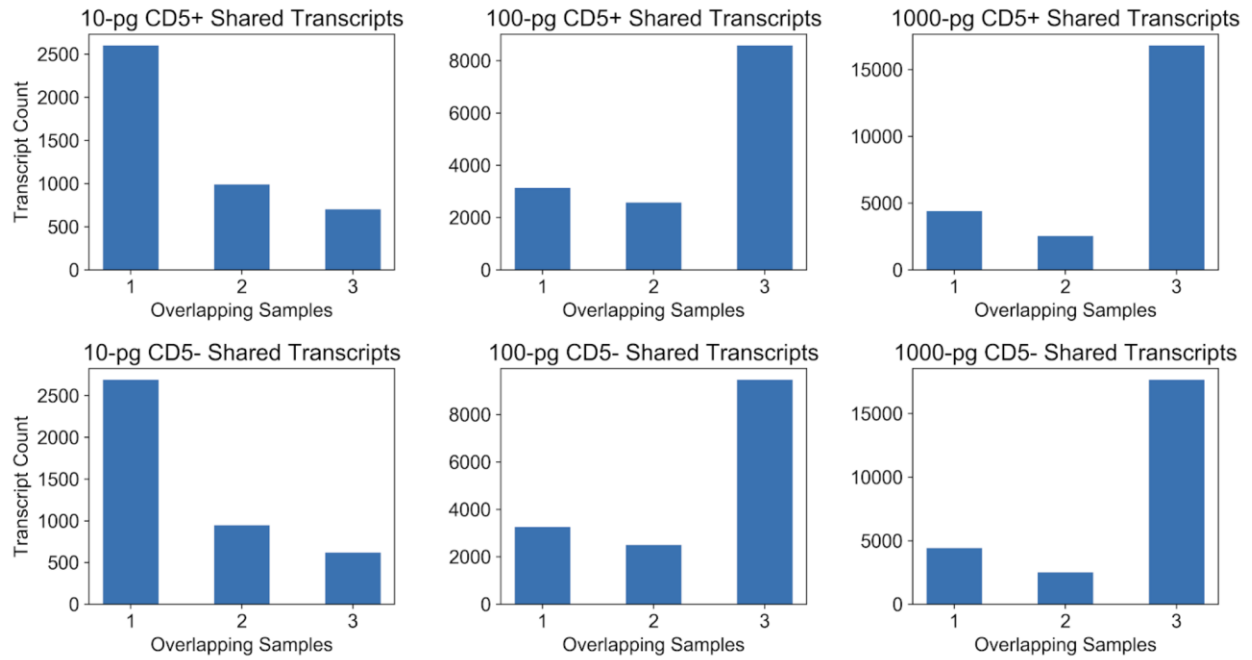

**Figure S4. Comparison of overlapping transcripts.** The analysis from Figure 3a was repeated, although CD5- and CD5+ samples were considered separately. Notably, the trend between CD5+ and CD5- mirrors that of the pooled data in Figure 3a.

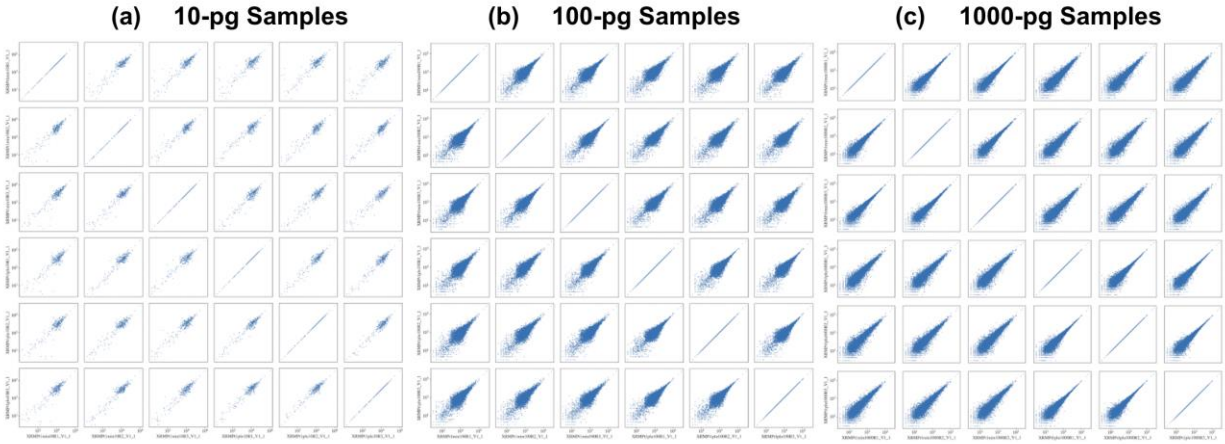

**Figure S5. CLEAR Filtering results in fewer noisy transcripts at the 10-pg sample level.** Analysis from Figure S3 was repeated using CLEAR-filtered gene counts. Notably, 10-pg samples are observed to be sparser, while the remaining data points are of much higher correlation.

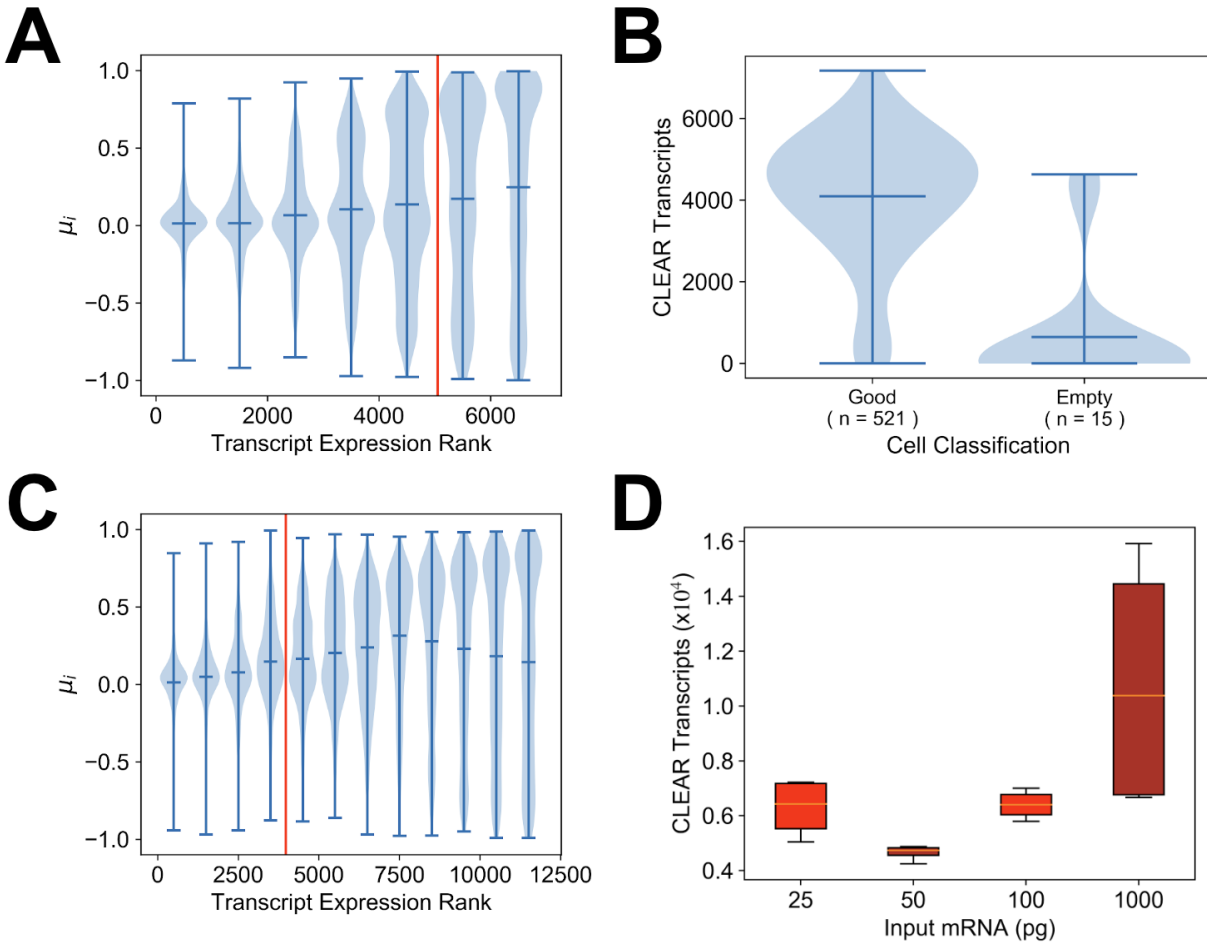

**Figure S6. Application of CLEAR to public datasets. A-B)** Data from Ilicic et al. [25] was processed using the CLEAR pipeline; **C-D)** Data from Bhargava et al. [14] was processed using the CLEAR pipeline; **A)** An example CLEAR trace from released data shows a representative separation; **B)** CLEAR transcript identity allows the separation of cells the authors classified as “Empty” from those classified as “Good.” **C)** An additional example trace; **D)** CLEAR transcript counts are indicative of the input mRNA mass used to generate a sequencing library.

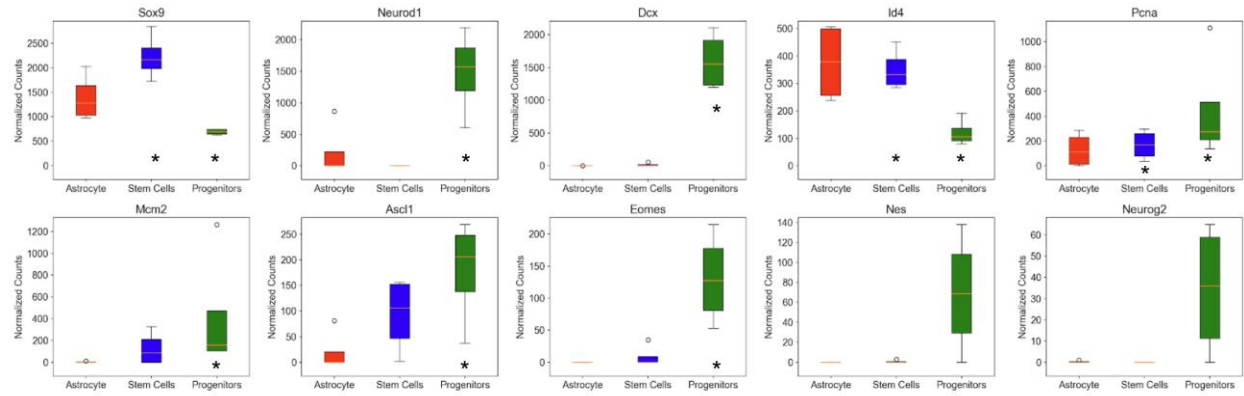

**Figure S7. Neuronal cell type markers which did not pass the CLEAR criterion.** Similar to Figure 4d, for each remaining gene, expression was plotted using the raw counts. Individual cell types which passed CLEAR filtering are indicated with an asterisk (\*) below the respective box plot. Boxplots: orange line, mean CLEAR transcripts for four biological replicates per neural cell type; whiskers: displaying 1.5X the interquartile range (IQR) beyond the first and the third quartiles; circles: outliers.
